# Supplementary material for: Nickel(ii) complexes of heterodichalcogenido and monochalcogenido imidodiphosphinate ligands: AACVD synthesis of nickel ditelluride
Source: Royal Society of Chemistry journal article supplement (doi:10.1039/b814065k), 2008-01-01
Supplement: b814065k.pdf [file b814065k.pdf]

Status Primary QM: Prototyping (P) Pressure/Temperature: Ambient Chemical Formula: Ni0.513 Te  
 Weight %: Ni19.09 Te80.91 Atomic %: Ni33.91 Te66.09 Compound Name: Nickel Tellurium

Radiation: CuK $\alpha$ 1 : 1.5406 d-Spacing: Calculated Intensity: Calculated I/lc: 10.75

Reference: "THE NICKEL-TELLURIUM SYSTEM". Shchukarev S.A., Apurina M.S. Russ. J. Inorg. Chem. (Engl. Transl.) 5, 1167 (1960). Calculated from LPF using POWD-12++.

SYS: Hexagonal SPGR: P-3m1 (164) AuthCellVol: 67.27 Z: 2  
 Author's Cell [ AuthCell-a: 3.844 AuthCell-c: 5.257 AuthCellVol: 67... ] Dcalc: 7.786  
 Dstruc: 7.77 SS/FOM: F 30.0 = 129( 0.006; 34.0 ) Reference: Ibid.

Space Group: P-3m1 (164) Z: 2 Molecular Weight: 157.71  
 Crystal Cell [ XtlCell-a: 3.844 XtlCell-b: 3.844 XtlCell-c: 5.257 XtlCell.: 90 XtlCell.: 90  
 XtlCell.: 120 XtlCellVol: 67... ] Crystal Data Axial Ratio [ c/a: 1.3676 ]  
 Reduced Cell [ RedCell-a: 3.844 RedCell-b: 3.844 RedCell-c: 5.257 RedCell.: 90 RedCell.: 90  
 RedCell.: 120 RedCellVol: 67... ]

## Atomic Coordinates:

| Atom | Num | Wyckoff | Symmetry | x       | y       | z    | SOF   | ITF | AET |
|------|-----|---------|----------|---------|---------|------|-------|-----|-----|
| Te   | 1   | 2d      | 3m.      | 0.33333 | 0.66666 | 0.25 | 1.0   |     | 6-b |
| Ni   | 2   | 1b      | -3m.     | 0.0     | 0.0     | 0.5  | 0.013 |     | 6-a |
| Ni   | 3   | 1a      | -3m.     | 0.0     | 0.0     | 0.0  | 1.0   |     | 6-a |

## SG Symmetry Operators:

| Seq | Operator | Seq | Operator  | Seq | Operator  | Seq | Operator | Seq | Operator   |
|-----|----------|-----|-----------|-----|-----------|-----|----------|-----|------------|
| 1   | x,y,z    | 3   | -y,x-y,z  | 5   | -x+y,-x,z | 7   | -y,-x,z  | 9   | x,x-y,z    |
| 2   | -x,-y,-z | 4   | y,-x+y,-z | 6   | x-y,x,-z  | 8   | y,x,-z   | 10  | -x,-x+y,-z |
|     |          |     |           |     |           |     |          | 11  | -x+y,y,z   |
|     |          |     |           |     |           |     |          | 12  | x-y,-y,-z  |

Pearson: hP3.03 LPF Prototype Structure: Cr0.88 S,hP4,164  
 Subfile(s): Inorganic, LPF Pattern, Metals & Alloys, Primary Pattern Entry Date: 01/05/2005  
 Last Modification Date: 01/27/2006

Database Comments: LPF Collection Code: 304964. Sample Preparation: STARTING MATERIALS:Te,Ni. Compound Preparation: powder metallurgical technique. Sample annealed at 1173 K for 6 d in evacuated quartz tube. Unit Cell Data Source: Powder Diffraction.

## 04-001-7260 (Fixed Slit Intensity) - Cu K1 1.54056Å

| 2       | d(Å)   | l    | h | k | l | 2        | d(Å)   | l   | h | k | l | 2        | d(Å)   | l   | h | k | l |
|---------|--------|------|---|---|---|----------|--------|-----|---|---|---|----------|--------|-----|---|---|---|
| 16.8512 | 5.257  | 68   | 0 | 0 | 1 | 75.4986  | 1.2582 | 6   | 2 | 1 | 0 | 113.0795 | 0.9233 | 2   | 3 | 1 | 0 |
| 26.7572 | 3.329  | 73   | 1 | 0 | 0 | 78.0218  | 1.2237 | 87m | 1 | 2 | 1 | 113.2488 | 0.9224 | 1   | 1 | 1 | 5 |
| 31.7902 | 2.8125 | 999  | 0 | 1 | 1 | 78.0218  | 1.2237 | m   | 0 | 1 | 4 | 115.778  | 0.9094 | 30m | 1 | 2 | 4 |
| 34.0812 | 2.6285 | 99   | 0 | 0 | 2 | 79.3278  | 1.2068 | 41  | 0 | 2 | 3 | 115.778  | 0.9094 | m   | 3 | 1 | 1 |
| 43.8483 | 2.063  | 239  | 0 | 1 | 2 | 85.4875  | 1.1349 | 38  | 1 | 2 | 2 | 117.1671 | 0.9026 | 13  | 2 | 2 | 2 |
| 47.2527 | 1.922  | 259  | 1 | 1 | 0 | 87.9164  | 1.1097 | 26  | 3 | 0 | 0 | 120.1213 | 0.8889 | 14  | 0 | 2 | 5 |
| 50.5197 | 1.8051 | 13   | 1 | 1 | 1 | 90.47    | 1.0849 | 46m | 1 | 1 | 4 | 123.0714 | 0.8762 | 2   | 0 | 0 | 6 |
| 52.1545 | 1.7523 | 2    | 0 | 0 | 3 | 90.47    | 1.0849 | m   | 0 | 3 | 1 | 124.3215 | 0.8711 | 15  | 1 | 3 | 2 |
| 55.1319 | 1.6645 | 8    | 2 | 0 | 0 | 94.2135  | 1.0514 | 1   | 0 | 0 | 5 | 130.5857 | 0.8479 | 23m | 0 | 3 | 4 |
| 58.0773 | 1.5869 | 133  | 0 | 2 | 1 | 96.6205  | 1.0315 | 3   | 0 | 2 | 4 | 130.5857 | 0.8479 | m   | 0 | 1 | 6 |
| 59.534  | 1.5515 | 187m | 1 | 1 | 2 | 97.8107  | 1.0221 | 56  | 1 | 2 | 3 | 132.1764 | 0.8426 | 1   | 2 | 2 | 3 |
| 59.534  | 1.5515 | m    | 0 | 1 | 3 | 100.3998 | 1.0026 | 19  | 0 | 1 | 5 | 135.4828 | 0.8323 | 1   | 4 | 0 | 0 |
| 66.4236 | 1.4063 | 50   | 0 | 2 | 2 | 106.5548 | 0.961  | 15  | 2 | 2 | 0 | 139.1337 | 0.822  | 12  | 0 | 4 | 1 |
| 71.7581 | 1.3143 | 18   | 0 | 0 | 4 | 109.1455 | 0.9453 | 1   | 2 | 2 | 1 | 141.1391 | 0.8168 | 24  | 1 | 3 | 3 |
| 73.0048 | 1.2949 | 3    | 1 | 1 | 3 | 110.497  | 0.9375 | 1   | 0 | 3 | 3 | 145.39   | 0.8068 | 24  | 1 | 2 | 5 |
